# Supplementary material for: A Deep Learning Model for 3D Ground Reaction Force Estimation Using Shoes with Three Uniaxial Load Cells
Source: MDPI journal article supplement (doi:10.3390/s23073428), 2023-03-24

## Supplementary Material

### A Deep Learning Model for 3D Ground Reaction Force Estimation using Shoes with Three Uniaxial Load Cells

This supplementary material includes contents which are not included in the main paper due to space limit.

#### A. Hyper-parameters

Table S1 presents the hyper-parameters used in Section 2.4 of the main paper.

Table S1. Hyper-parameters used in 3-axis GRF estimate seq2seq LSTM model.

| Input data size            | 1 <sup>st</sup> Layer size |                           |                         | 2 <sup>nd</sup> Layer size |                           |                         |
|----------------------------|----------------------------|---------------------------|-------------------------|----------------------------|---------------------------|-------------------------|
|                            | Size                       | State Activation Function | Gat Activation Function | Size                       | State Activation Function | Gat Activation Function |
| 200                        | 200                        | Tanh                      | Sigmoid                 | 50                         | Tanh                      | Sigmoid                 |
| 3 <sup>rd</sup> Layer size |                            |                           | Dropout                 | Output layer               |                           |                         |
| Size                       | State Activation Function  | Gat Activation Function   |                         | Size                       | Loss Function             |                         |
| 200                        | Tanh                       | Sigmoid                   | 0.5                     | 200                        | Mean Squared Error        |                         |
| Learning Rate              |                            | Optimizer                 |                         | Epochs                     |                           | Mini Batch Size         |
| 0.01(constant)             |                            | Adam                      |                         | 1000                       |                           | 32                      |

#### B. Computer spec

Table S2 is the computer specifications used to train the seq2seq LSTM model in section 2.4 of the main paper.

Table S2. Computer spec.

| Operating system                   | System Manufacturer          | System Model            | BIOS         |
|------------------------------------|------------------------------|-------------------------|--------------|
| Window 10 Enterprise               | Gigabyte Technology Co., Ltd | X570 GAMING X           | F3           |
| CPU                                | Memory                       | GPU                     |              |
| AMD Ryzen 7 3700X 8-Core Processor | 32,716MB RAM                 | Model                   | Total Memory |
|                                    |                              | NVIDIA GeForce RTX 2080 | 24,360 MB    |

## C. Learning cost

Table S3 shows the time required to learn the seq2seq LSTM model in section 2.4 using the computer in Table S2. And Figure S1 is the learning cost

Table S3. Time required for training with 1000 epochs.

|               |                     |
|---------------|---------------------|
| Learning Time | 1 minute 37 seconds |
|---------------|---------------------|

Figure S1. Learning cost.

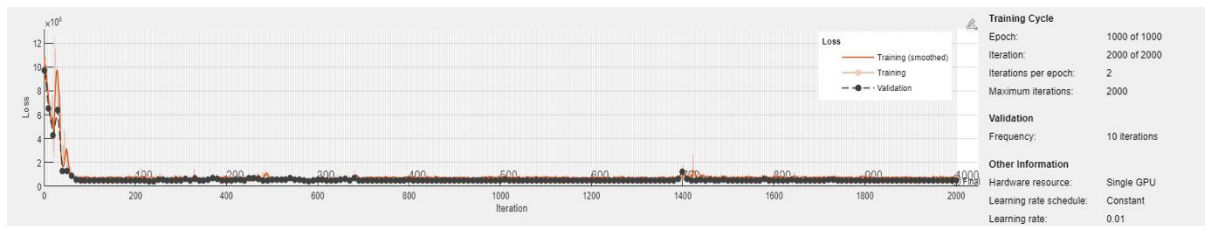

Supplement: s1 [file s1]
